# Supplementary material for: Transcriptome Analysis of Integument Differentially Expressed Genes in the Pigment Mutant (quail) during Molting of Silkworm, Bombyx mori
Source: PLoS One. 2014 Apr 9;9(4):e94185. doi: 10.1371/journal.pone.0094185 (PMC3981777; doi:10.1371/journal.pone.0094185)
Supplement: Table S6 — Differentially expressed cuticular protein genes. (XLS) [file pone.0094185.s008.xls]

## Sheet: Up-regulated expressed genes
			RPKM
Genes	Motif	Folda	Dazao	q	P-value (q/Dazao)	FDR
BGIBMGA000251	RR2	21.5684	0.269564	5.81406	2.138e-15	3.136e-14
BGIBMGA004074	glycine-rich	7.47703	0.949439	7.09898	7.42e-05	0.0003977
BGIBMGA002770	RR2	5.92853	5.53463	32.8122	5.899e-17	9.376e-16
BGIBMGA000371	RR1	4.28866	8.11708	34.8114	1.249e-32	2.814e-31
BGIBMGA002384	glycine-rich	3.67227	3832.96	14075.7	0	0
BGIBMGA001959	glycine-rich	3.36758	43.5457	146.644	5.751e-30	1.25e-28
BGIBMGA000247	RR3	2.82349	6.98315	19.7169	1.771e-07	1.395e-06
BGIBMGA010501	hypothetical	2.68406	3.63	9.74314	2.552e-12	3.11e-11
BGIBMGA011766	hypothetical	2.54665	143.88	366.413	1.727e-144	5.626e-143
BGIBMGA002549	RR1	2.544	6967.34	17724.9	0	0
BGIBMGA008136	RR2	2.36679	8.61036	20.3789	1.1e-20	2.017e-19
BGIBMGA000255	RR2	2.36553	135.16	319.725	1.21e-24	2.397e-23
BGIBMGA002385	glycine-rich	2.25422	2491.01	5615.3	0	0
BGIBMGA000435	RR2	2.13505	96.558	206.156	7.877e-26	1.6e-24
BGIBMGA008254	hypothetical	2.03919	75.6508	154.266	8.592e-25	1.707e-23
Folda: Fold change (q/Dazao) of gene expression in RPKM.

## Sheet: Down-regulated expressed genes
			RPKM
Genes	Motif	Folda	Dazao	q	P-value (q/Dazao)	FDR
BGIBMGA003060	RR2	0.0151357	67.0541	1.01491	0	0
BGIBMGA000259	RR2	0.034648	25.0135	0.866665	0	0
BGIBMGA000369	RR1	0.0443197	2658.58	117.828	0	0
BGIBMGA000345	RR1	0.0474444	1699.38	80.626	0	0
BGIBMGA000325	RR1	0.0591282	54.1494	3.20176	0	0
BGIBMGA011728	hypothetical	0.0621988	177.158	11.019	0	0
BGIBMGA000335	RR1	0.0647113	280.016	18.1202	0	0
BGIBMGA011757	hypothetical	0.0729826	269.471	19.6667	0	0
BGIBMGA011725	hypothetical	0.0763537	198.783	15.1778	0	0
BGIBMGA005148	RR1	0.100821	1585.98	159.9	0	0
BGIBMGA011759	hypothetical	0.107907	181.791	19.6166	0	0
BGIBMGA011720	hypothetical	0.109307	299.145	32.6986	0	0
BGIBMGA003095	RR2	0.112531	48.7025	5.48052	0	0
BGIBMGA000438	RR2	0.119824	6.10161	0.73112	2.909e-05	0.000167
BGIBMGA011722	hypothetical	0.133489	450.036	60.0749	0	0
BGIBMGA000326	RR1	0.139781	6429.48	898.719	0	0
BGIBMGA000429	RR2	0.143095	520.604	74.4959	0	0
BGIBMGA000274	RR2	0.150944	206.548	31.1772	0	0
BGIBMGA000260	RR2	0.156861	6.59303	1.03419	8.069e-05	0.0004296
BGIBMGA000434	RR2	0.176503	176.323	31.1216	0	0
BGIBMGA000433	RR2	0.183394	183.033	33.5672	0	0
BGIBMGA011730	hypothetical	0.203543	1323.59	269.407	0	0
BGIBMGA000347	RR1	0.211614	10.9561	2.31845	1.377e-14	1.93e-13
BGIBMGA012595	RR1	0.213021	6.55371	1.39608	0.0001058	0.0005552
BGIBMGA011726	hypothetical	0.21522	2090.83	449.989	0	0
BGIBMGA008261	glycine-rich	0.257366	718.038	184.798	0	0
BGIBMGA011724	hypothetical	0.274305	34.5229	9.46982	4.491e-08	3.834e-07
BGIBMGA001444	RR1	0.305895	52.4735	16.0514	0	0
BGIBMGA010232	RR2	0.307106	2293.94	704.483	0	0
BGIBMGA010141	RR2	0.314124	41.5097	13.0392	4.206e-13	5.385e-12
BGIBMGA000250	RR2	0.318801	906.387	288.957	0	0
BGIBMGA000436	RR2	0.321498	251.051	80.7122	0	0
BGIBMGA012213	RR1	0.32275	129.677	41.8531	0	0
BGIBMGA011559	CPF-like	0.322761	79.7229	25.7314	0	0
BGIBMGA011998	RR1	0.344444	260.133	89.6013	0	0
BGIBMGA011729	hypothetical	0.344803	1846.03	636.517	0	0
BGIBMGA011492	44 aa residues	0.37324	34.5375	12.8908	2.641e-08	2.308e-07
BGIBMGA011731	hypothetical	0.381756	2259.25	862.484	0	0
BGIBMGA009775	hypothetical	0.395528	63.5702	25.1438	0	0
BGIBMGA011761	hypothetical	0.397421	587.46	233.469	0	0
BGIBMGA006826	Tweedle	0.433241	1452.79	629.407	0	0
BGIBMGA000249	RR2	0.465624	5422.77	2524.97	0	0
BGIBMGA011455	CPF-like	0.473617	3434.75	1626.75	0	0
BGIBMGA000271	RR2	0.483095	147.812	71.4072	0	0
BGIBMGA007085	RR1	0.483131	24.9891	12.073	5.984e-05	0.0003271
BGIBMGA008212	glycine-rich	0.494073	5260.69	2599.16	0	0
BGIBMGA010500	hypothetical	0.497115	734.002	364.884	0	0
Folda: Fold change (q/Dazao) of gene expression in RPKM.
